# Supplementary material
Source: Springer Nature journal article supplement (https://www.springermedizin.de/resource/supplementary/12885_2012_4027_MOESM25_ESM.pdf/9465002)

# Unstained Whole Mount

**A**

SHG-B 500-530 nm SHG-F

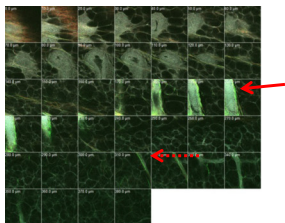**B**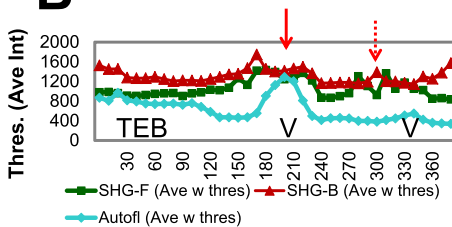**C**Ortho  
SHG-B / SHG-F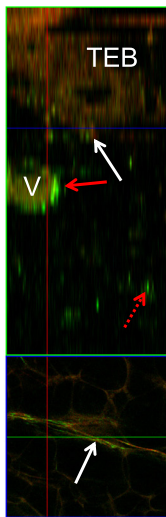**D** Ortho  
Autofl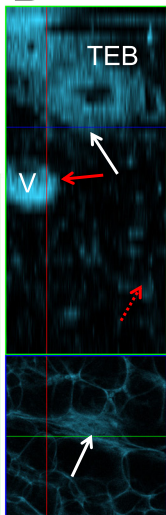**E** 3D Cut  
SHG-B / SHG-F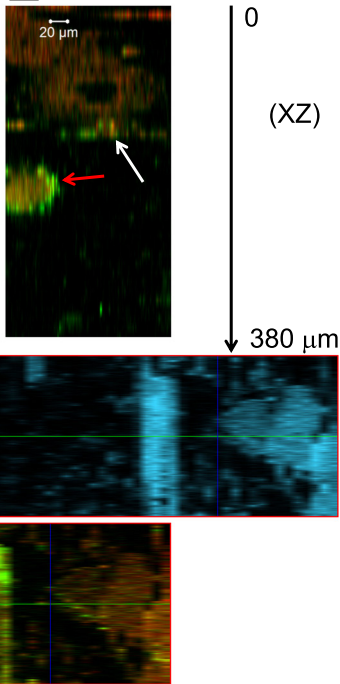

Supplement: MOESM25 [file 9465002]
